# Supplementary material for: Evidence for a Conserved Function of Eukaryotic Pantothenate Kinases in the Regulation of Mitochondrial Homeostasis and Oxidative Stress
Source: MDPI journal article supplement (doi:10.3390/ijms24010435), 2022-12-27
Supplement: s1 [file s1]

# Evidence for a Conserved Function of Eukaryotic Pantothenate Kinases in the Regulation of Mitochondrial Homeostasis and Oxidative Stress

Camilla Ceccatelli Berti <sup>1,†</sup>, Shalev Gihaz <sup>2,†</sup>, Sonia Figuccia <sup>1,2</sup>, Jae-Yeon Choi <sup>2</sup>, Anasuya C. Pal <sup>2</sup>, Paola Goffrini <sup>1,\*</sup> and Choukri Ben Mamoun <sup>2,\*</sup>

<sup>1</sup> Department of Chemistry, Life Sciences and Environmental Sustainability, University of Parma, 43124 Parma, Italy

<sup>2</sup> Department of Internal Medicine, Section of Infectious Diseases, Yale School of Medicine, New Haven, CT 06520, USA

\* Correspondence: paola.goffrini@unipr.it (P.G.); choukri.benmamoun@yale.edu (C.B.M.); Tel.: +39-052-190-5107 (P.G.); +1-203-737-1972 (C.B.M.)

† These authors contributed equally to this work.

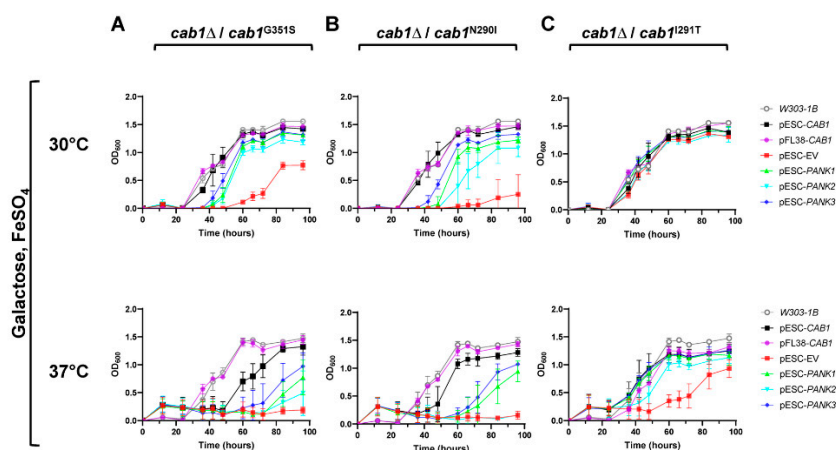

**Figure S1.** Iron sensitivity of PanK-deficient yeast strains expressing human PanKs. Growth curves of yeast strains *cab1*<sup>G351S</sup>(A), *cab1*<sup>N290I</sup>(B), and *cab1*<sup>I291T</sup>(C) carrying an empty vector or expressing either the wild type yeast *CAB1* or human *PANK1*, 2, or 3 were determined in liquid media containing 2% galactose at 30°C or 37°C (from top to bottom). Yeast cells were inoculated in tubes at a final volume of 3.5 mL at a density of 10<sup>4</sup> cells/ml in SC-URA-TRP media (2% galactose) without or with 7 mM FeSO<sub>4</sub> and optical density (OD<sub>600</sub>) was measured at the indicated time points. The assays were conducted in triplicates (n=3) and the plotted graphs represent the average ±SEM.
